# Supplementary material for: Non-isothermal cold crystallization of liquid crystalline porphyrins
Source: Royal Society of Chemistry journal article supplement (doi:10.1039/d3sm00760j), 2023-01-01
Supplement: d3sm00760j1.pdf [file d3sm00760j1.pdf]

Electronic Supplementary Information for

# **Non-isothermal cold crystallization of liquid crystalline porphyrins**

Alec L. Dorfner, Diana P. Locoteta, Caleb D. Messinger, Michael R. Ramsey, Nathaniel Y. Kim,  
Elene Sadzaglishvili, Joshua C. Kranick, Joseph S. Kuehner, Collin J. Timony, Michelle Langton,  
Jeffrey E. Winklerek, Lucas J. Tucker, Jodi L. O'Donnell\*

*Siena College, Department of Chemistry and Biochemistry, 515 Loudon Road, Loudonville NY,  
12211, USA*

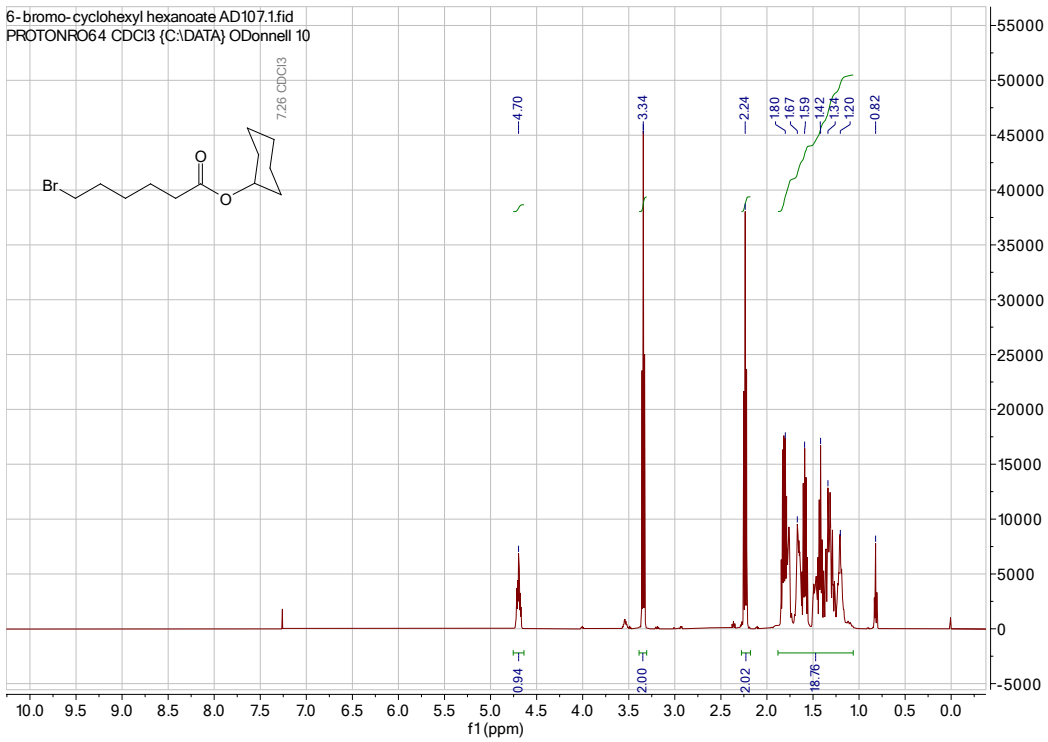

Fig. S1  $^1\text{H}$  NMR of cyclohexyl 6-bromohexanoate.

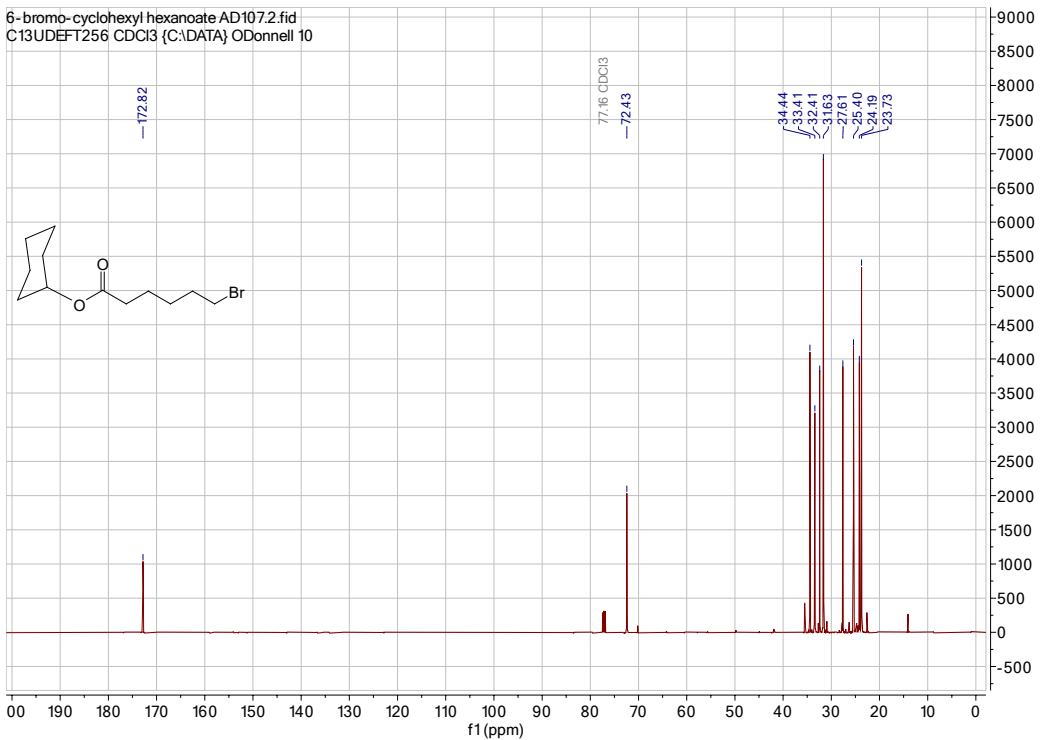

Fig. S2  $^{13}\text{C}$  NMR of cyclohexyl 6-bromohexanoate.

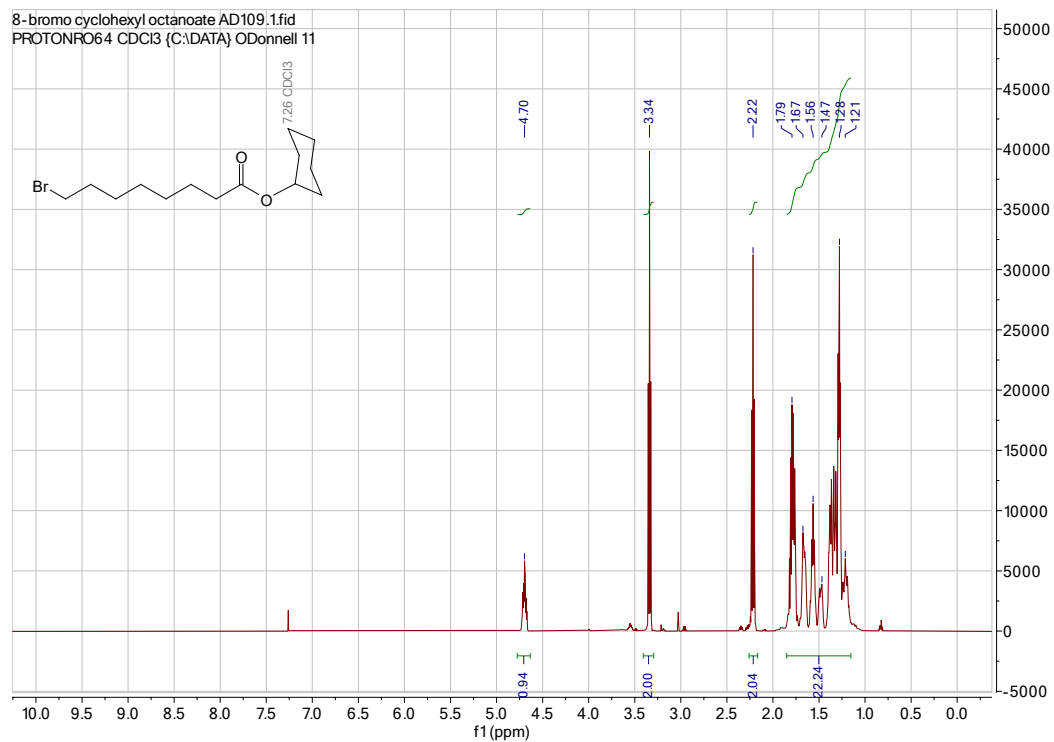

Fig. S3 <sup>1</sup>H NMR of cyclohexyl 8-bromooctanoate.

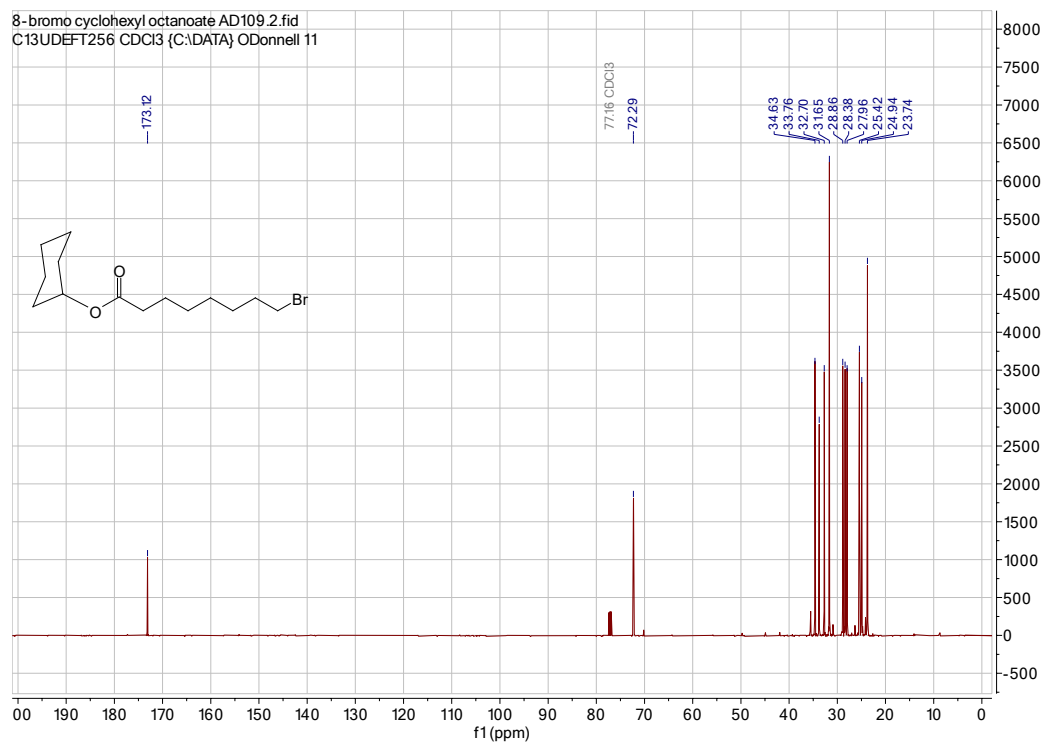

Fig. S4 <sup>13</sup>C NMR of cyclohexyl 8-bromooctanoate.

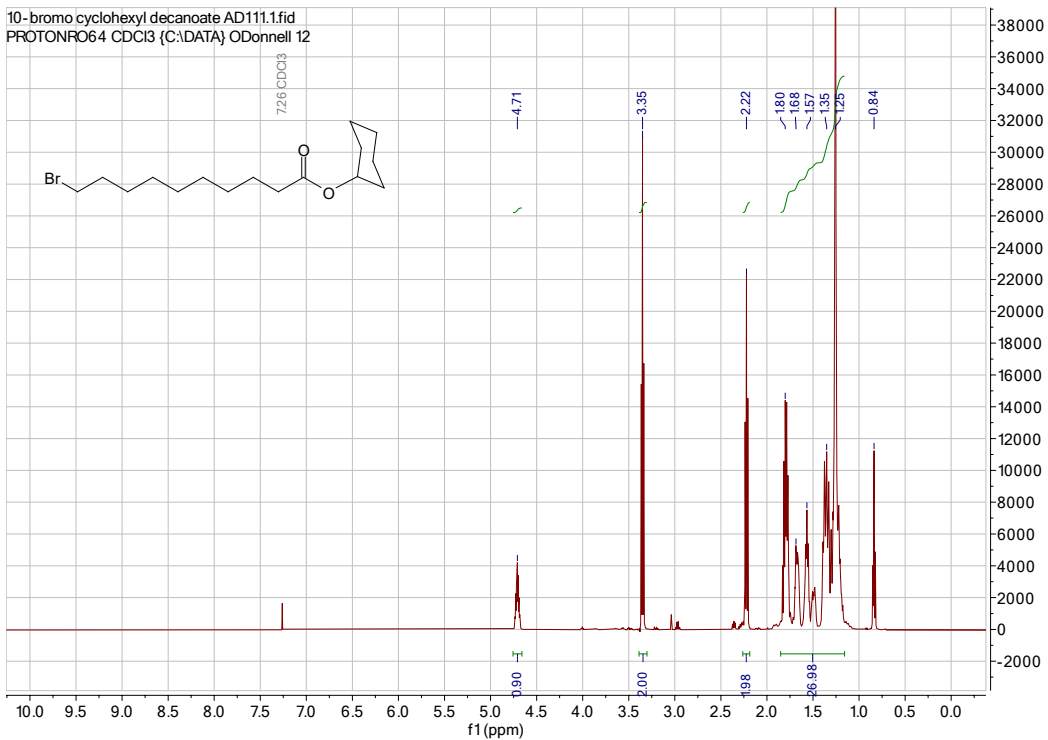

Fig. S5 <sup>1</sup>H NMR of cyclohexyl 10-bromodecanoate.

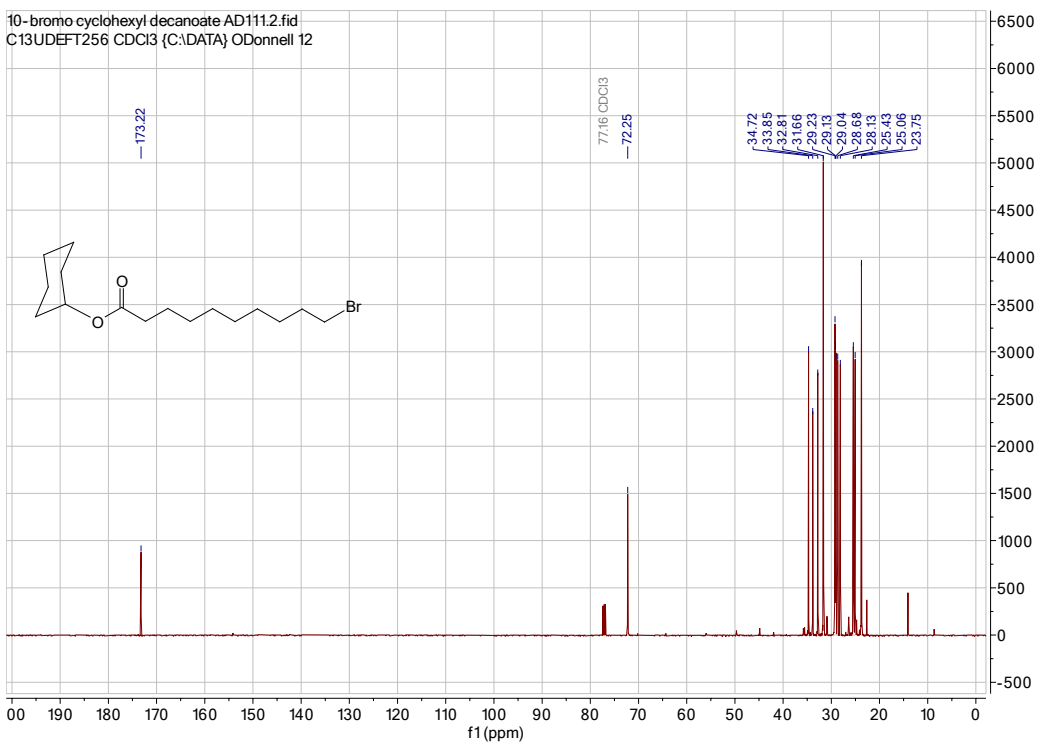

Fig. S6 <sup>13</sup>C NMR of cyclohexyl 10-bromodecanoate.

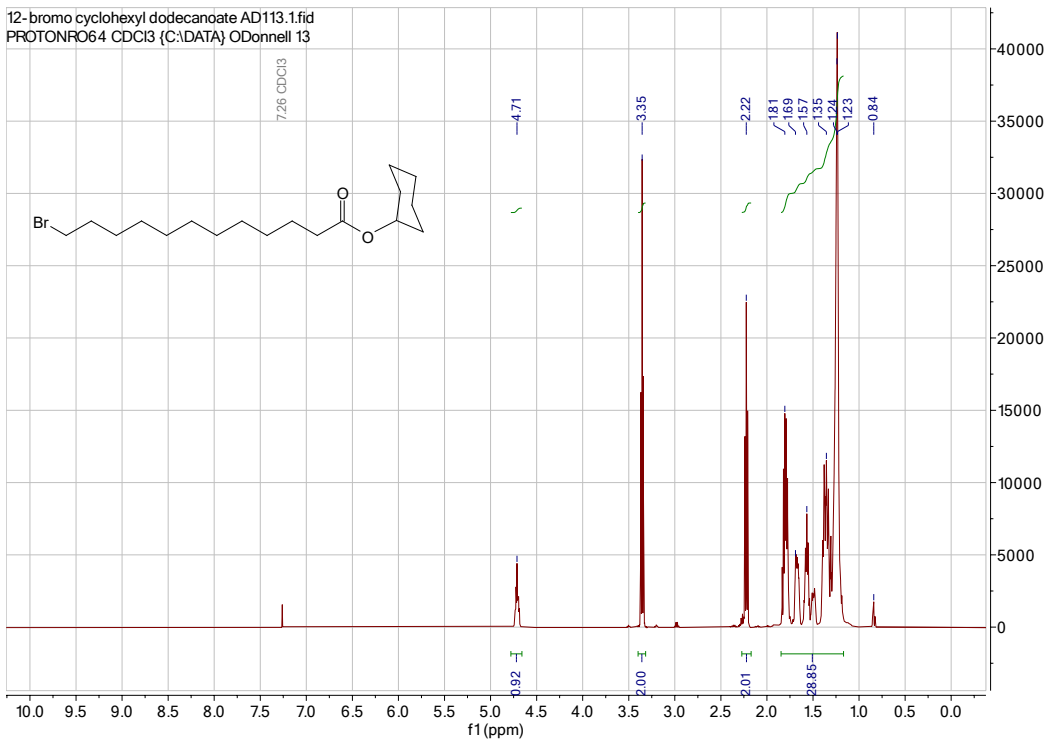

Fig. S7 <sup>1</sup>H NMR of cyclohexyl 12-bromododecanoate.

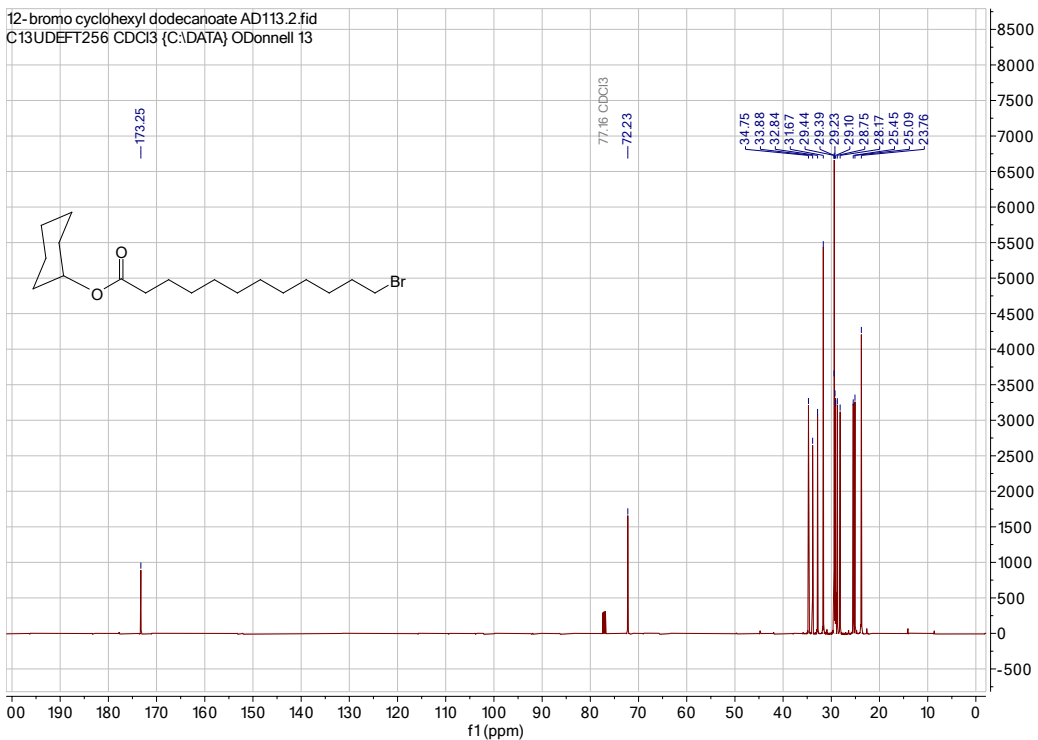

Fig. S8 <sup>13</sup>C NMR of cyclohexyl 12-bromododecanoate.

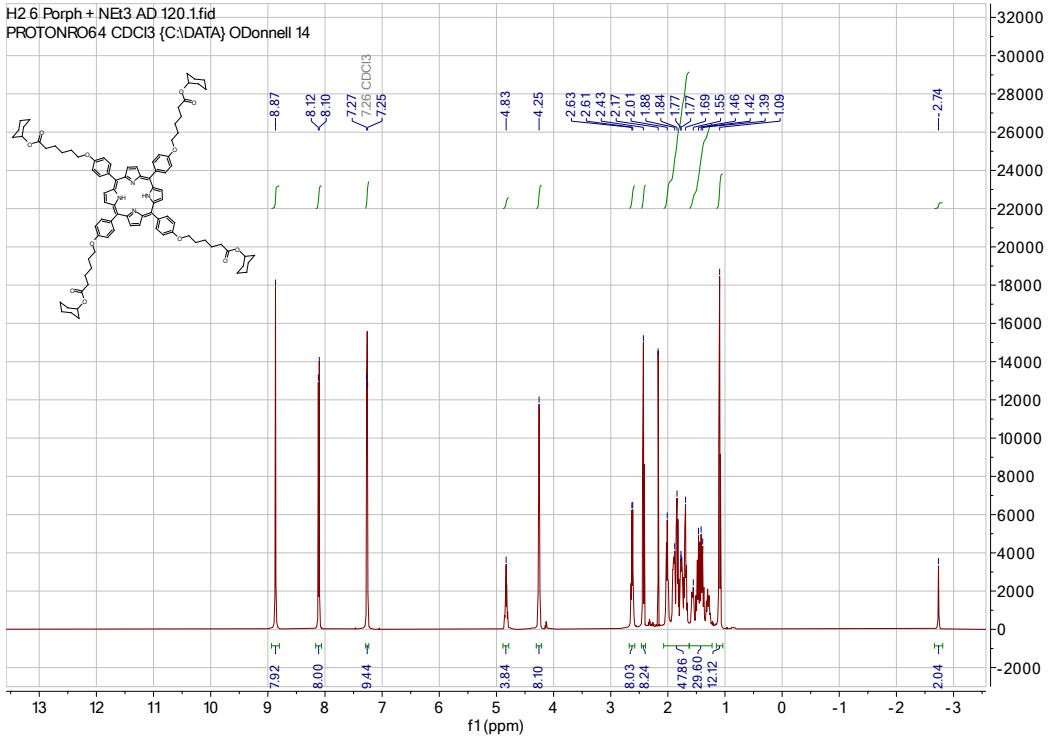

Fig. S9  $^1\text{H}$  NMR of 1.

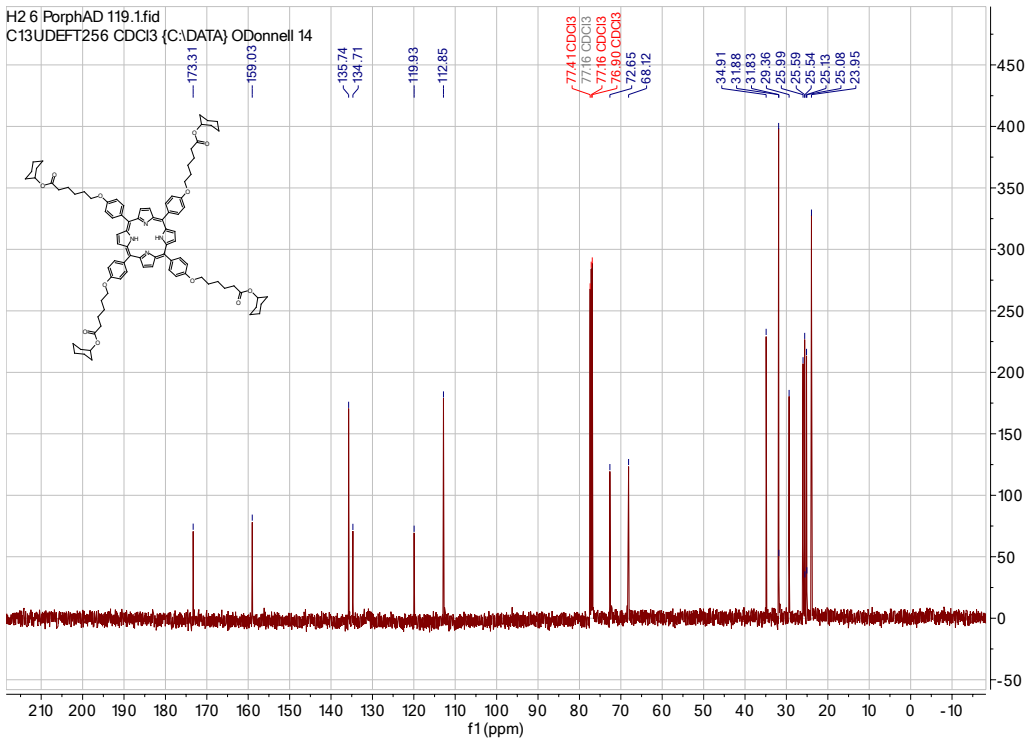

Fig. S10  $^{13}\text{C}$  NMR of 1.

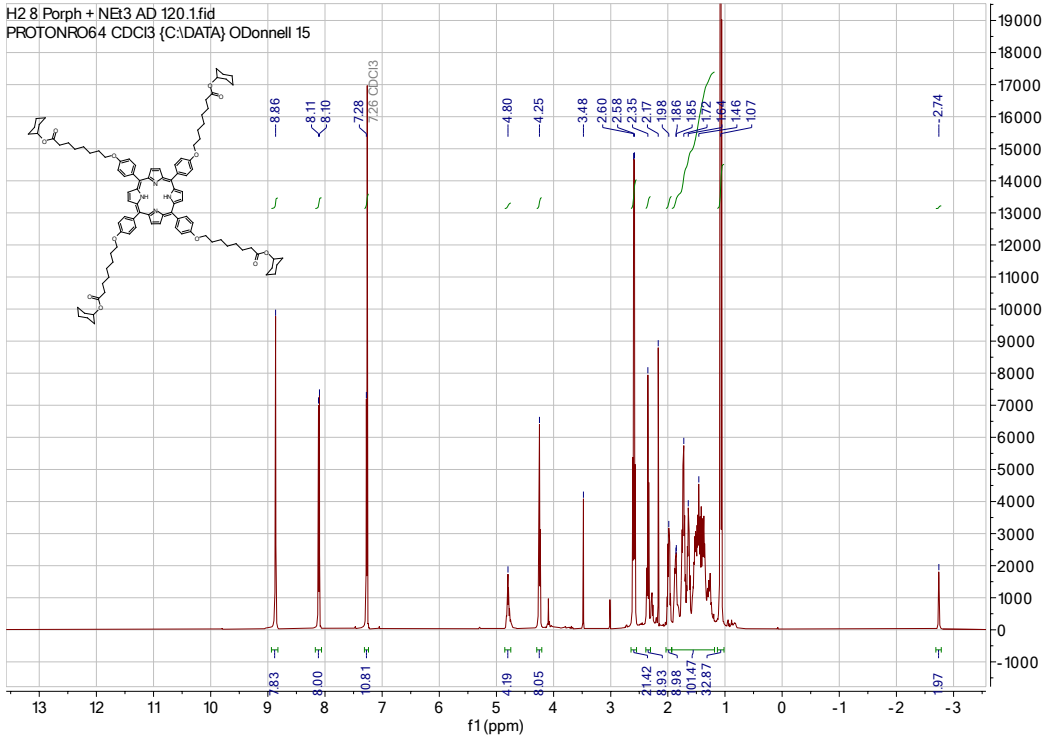

Fig. S11 <sup>1</sup>H NMR of 2.

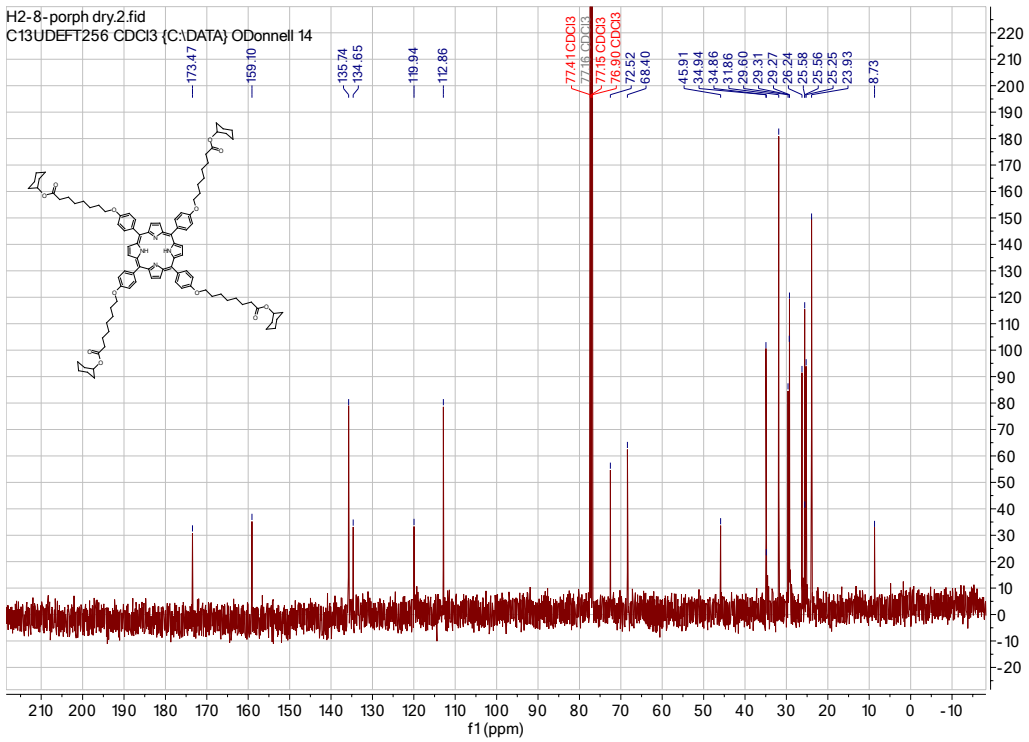

Fig. S12 <sup>13</sup>C NMR of 2.

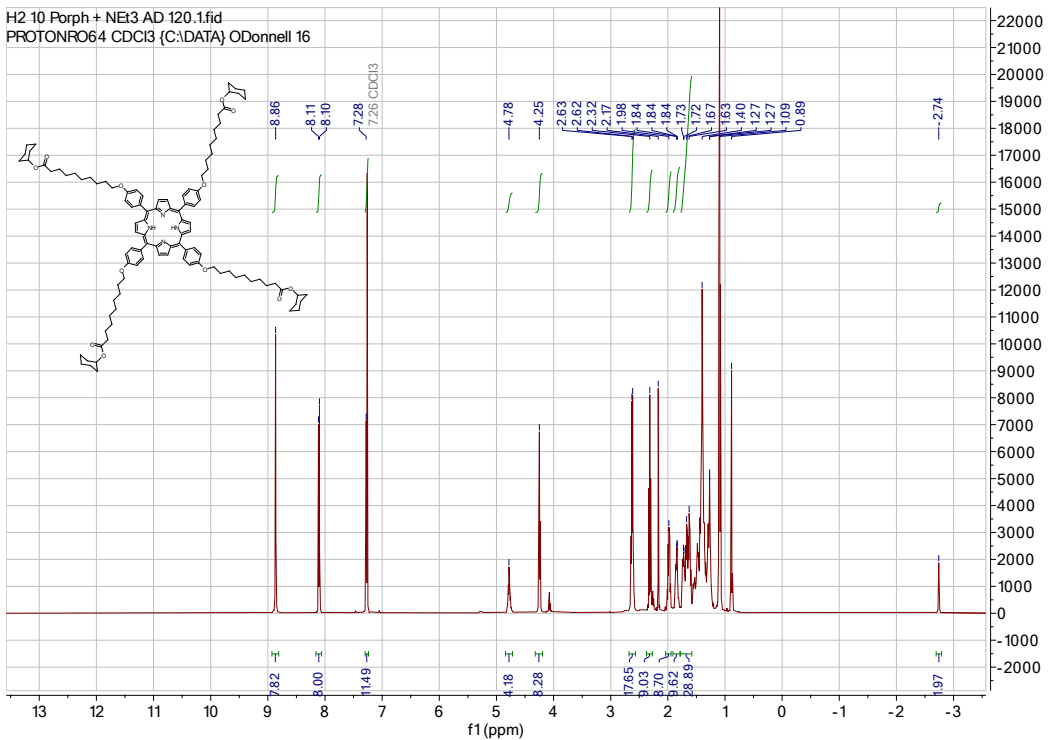

Fig. S13 <sup>1</sup>H NMR of 3.

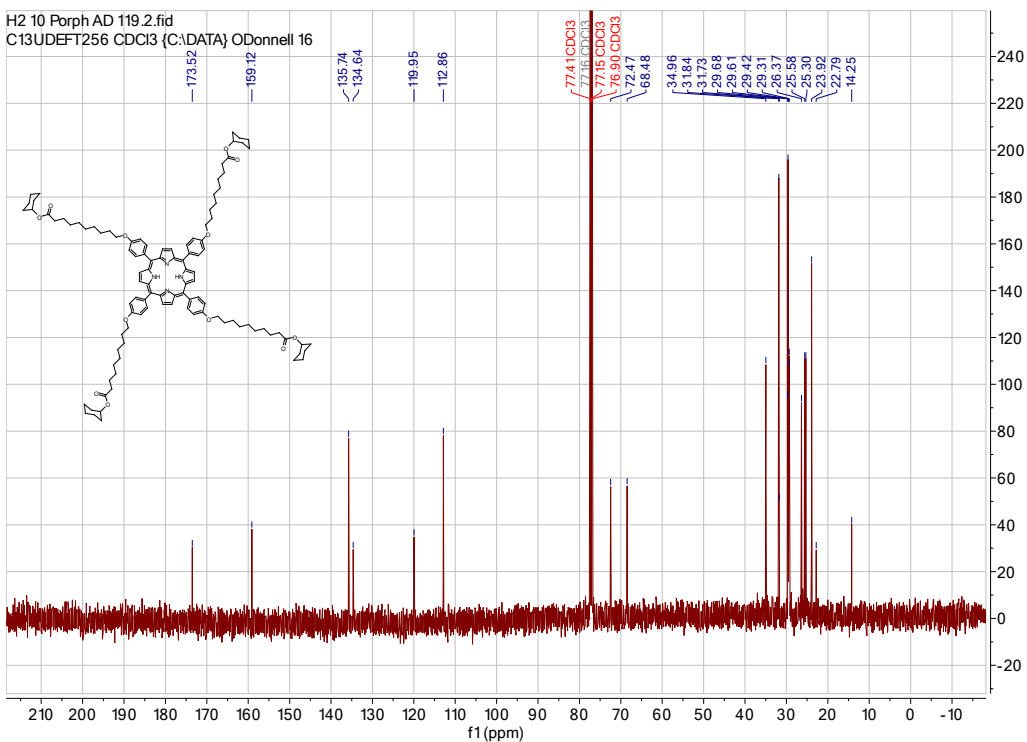

Fig. S14 <sup>13</sup>C NMR of 3.



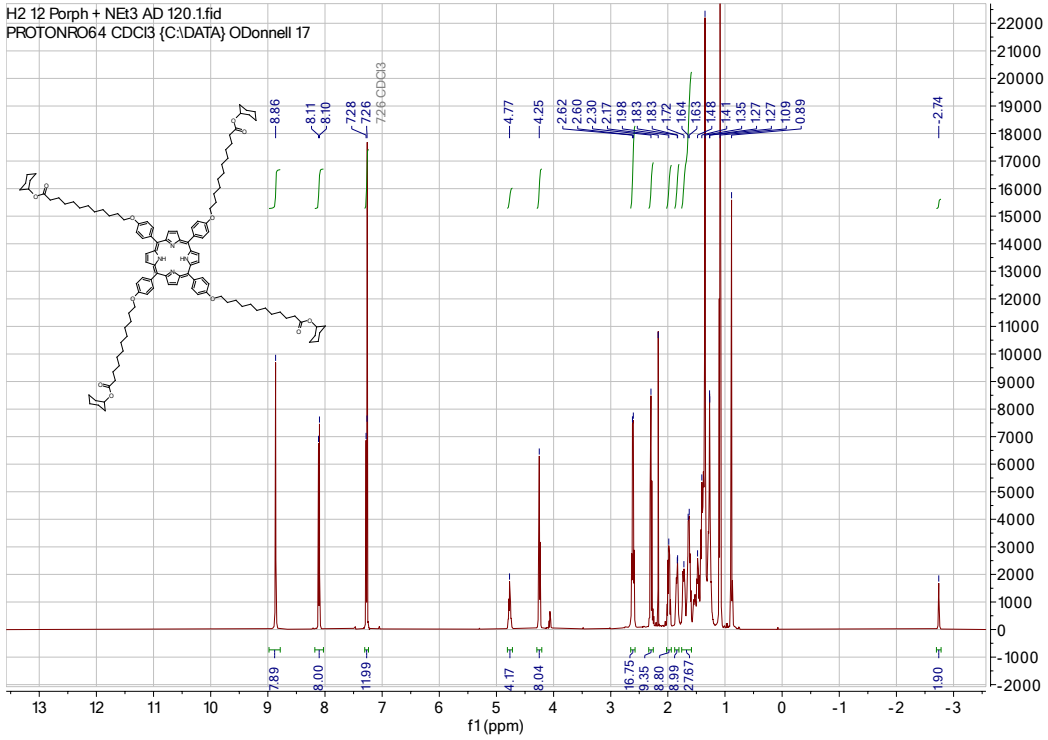

Fig. S15 <sup>1</sup>H NMR of 4.

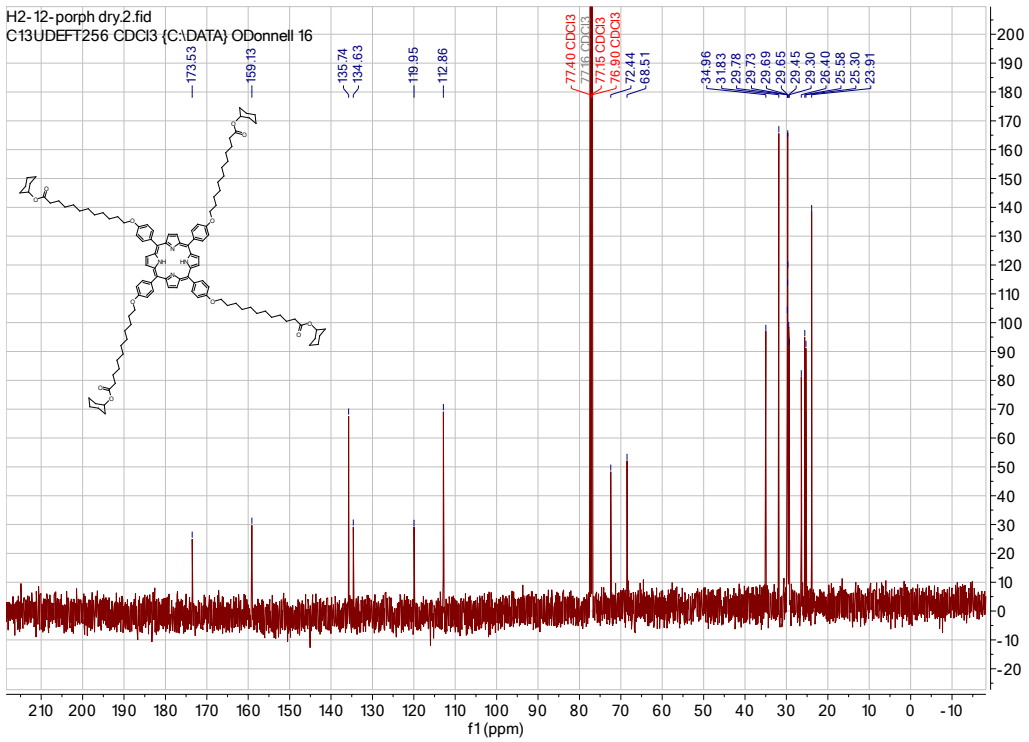

Fig. S16 <sup>13</sup>C NMR of 4.

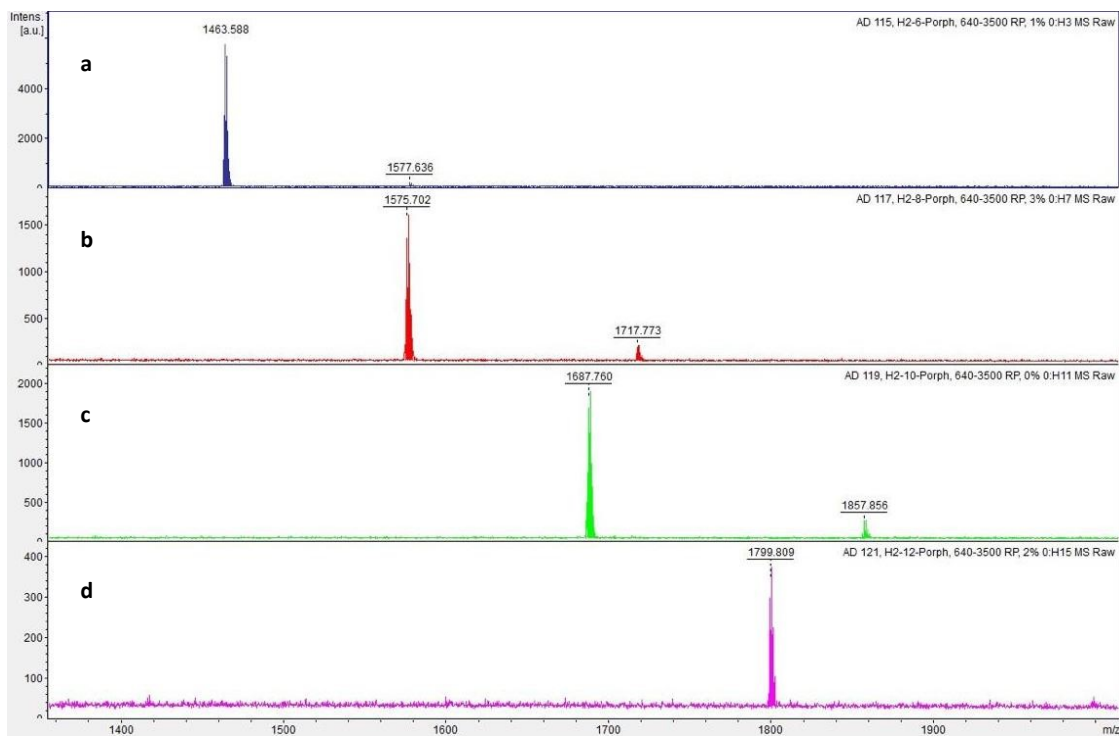

Fig. S17 MALDI-TOF MS of **1** – **4**, panels a – d, respectively.

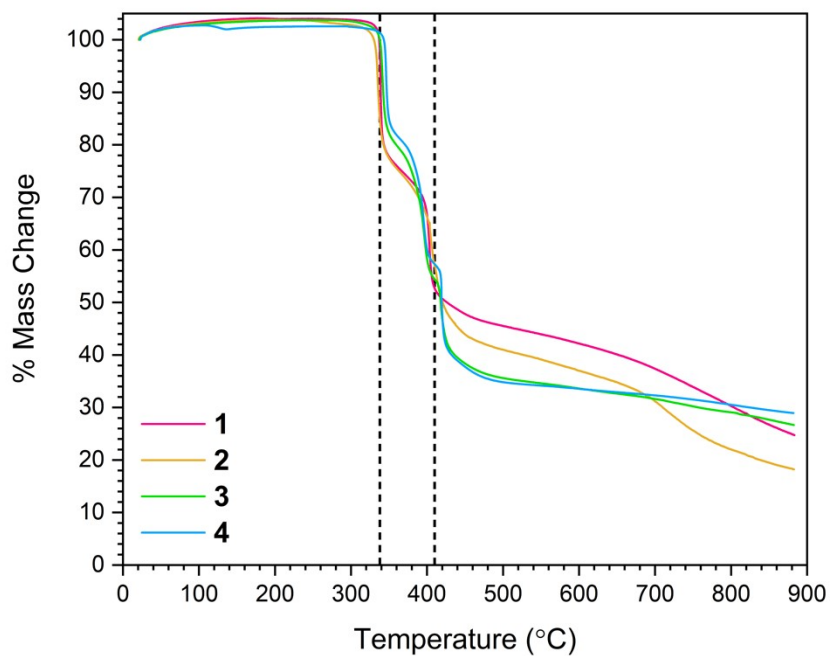

Fig. S18 TGA of all four molecules showing loss of cyclohexanol at 338 °C and alkanolic acid at 410 °C.

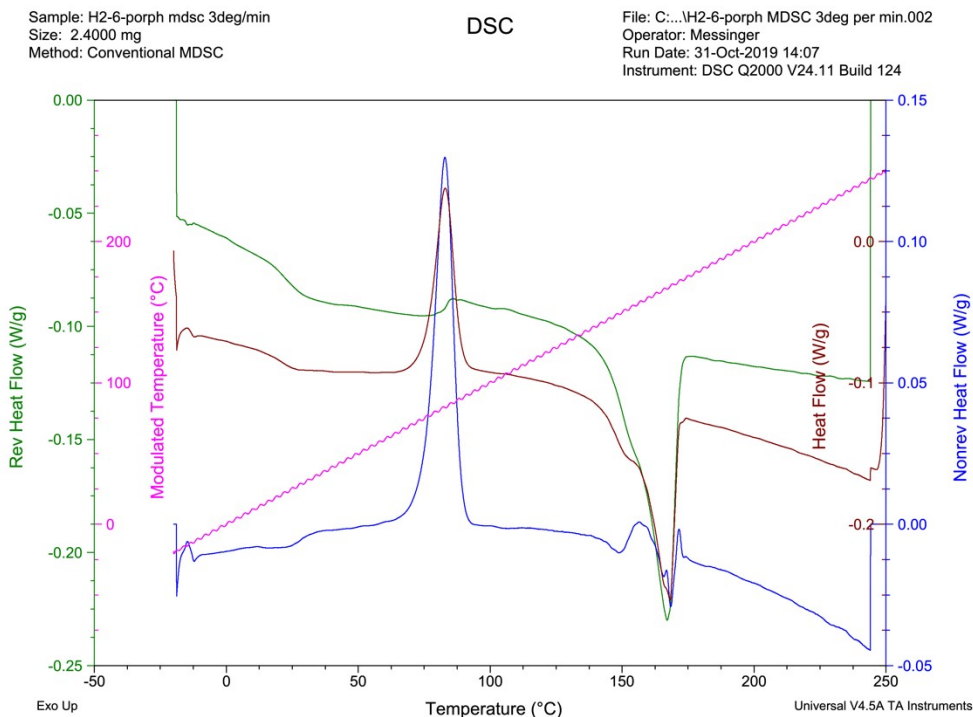

**Fig. S19** MDSC of **1** showing modulated temperature (magenta), total heat flow (maroon), reversing heat flow for thermal events (green), and non-reversing heat flow for kinetic events (blue).

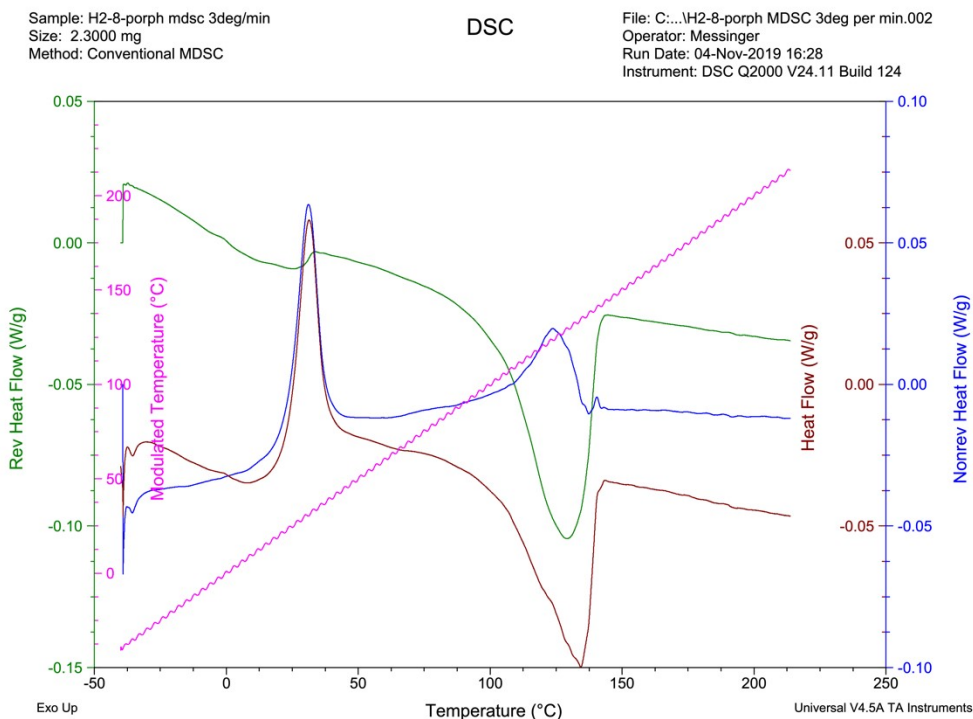

**Fig. S20** MDSC of **2** showing modulated temperature (magenta), total heat flow (maroon), reversing heat flow for thermal events (green), and non-reversing heat flow for kinetic events (blue).

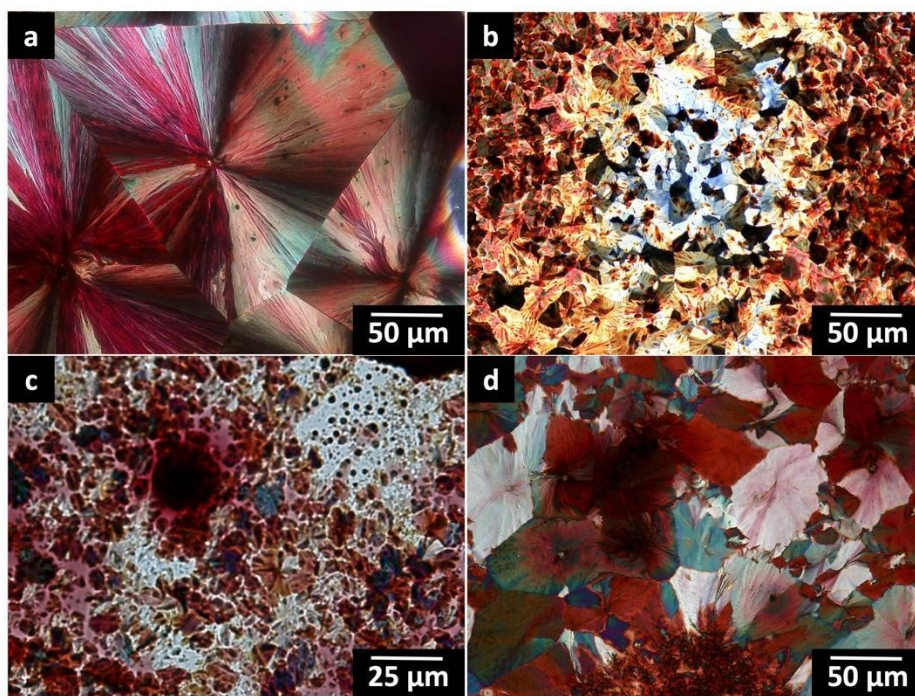

**Fig. S21** 1 – 4 cooling from isotropic transition: (a) 1 cooled for 30 min, (b) 2 cooled for 90 min, (c) 3 cooled for 1 min, 4 cooled for 3 min.

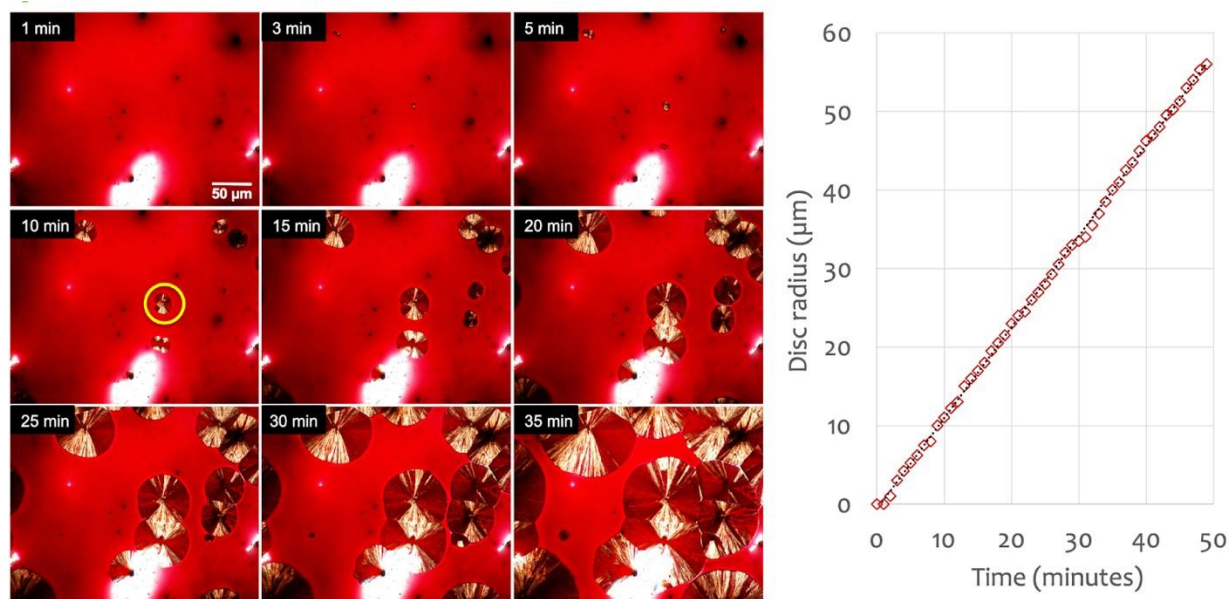

**Fig. S22** (Left) HS-POM of isothermal cold crystallization of 1 at 90 °C. (Right) Disc radius vs. time for one disc (circled in 10 min micrograph);  $y = 1.1583 - 0.6329x$ ,  $R^2 = 0.9994$ .

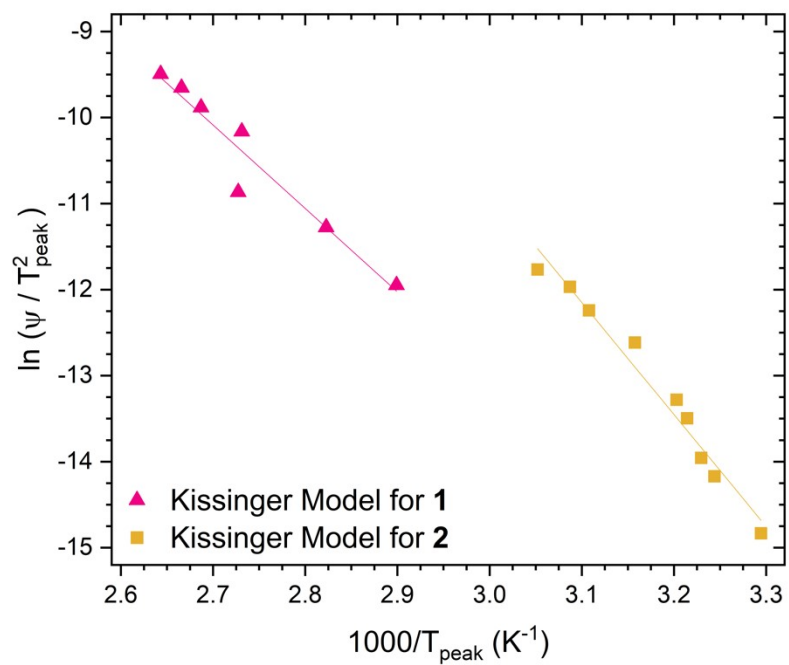

**Fig. S23.** Kissinger plots:  $E_a \text{ 1} = 81 \pm 10 \text{ kJ/mol}$  ( $R^2 = 0.92$ ),  $E_a \text{ 2} = 108 \pm 7 \text{ kJ/mol}$  ( $R^2 = 0.97$ ).
